# Supplementary material
Source: MDPI journal article supplement (https://www.mdpi.com/1424-8247/16/3/370)
Supplement: s1 [file s1]

## Table of contents

Figure S1. PXRD patterns of the PTU cocrystals obtained by LAG, compared with their respective components.

Figure S2. PXRD patterns of PTU cocrystals obtained by grinding the two components at different molar ratios.

Figure S3. ORTEP representation showing the asymmetric unit of PTU—CAT (a), PTU—RES (b), PTU—ORC (c) and PTU—HQ with atom numbering scheme (thermal ellipsoids are plotted with the 50% probability level).

Figure S4. FT-IR spectrum of pure PTU and the cocrystals reported.

Figure S5. DSC-TG traces of a) ETZ—CAT, b) ETZ—RES, c) ETZ—ORC and d) ETZ—HQ.

Figure S6. PXRD patterns of the reported PTU cocrystals after aqueous slurring (pH 6.8 phosphate buffer medium) for 24 hours.

Figure S7. PXRD patterns of reported molecular salts under accelerated ageing conditions for 2 months.

Figure S8. Calibration curve of PTU determined from HPLC data.

Table S1. Crystallographic data and structure refinement details of PTU cocrystals.

Table S2. Hydrogen bonds for PTU cocrystals [ $\text{\AA}$  and deg.].

Table S3.  $\pi$ -stacking interactions analysis of PTU cocrystals.

Table S4. Maximum apparent solubility ( $S_{\text{max}}$ ) of PTU and its cocrystals in pH 6.8 phosphate buffer medium.

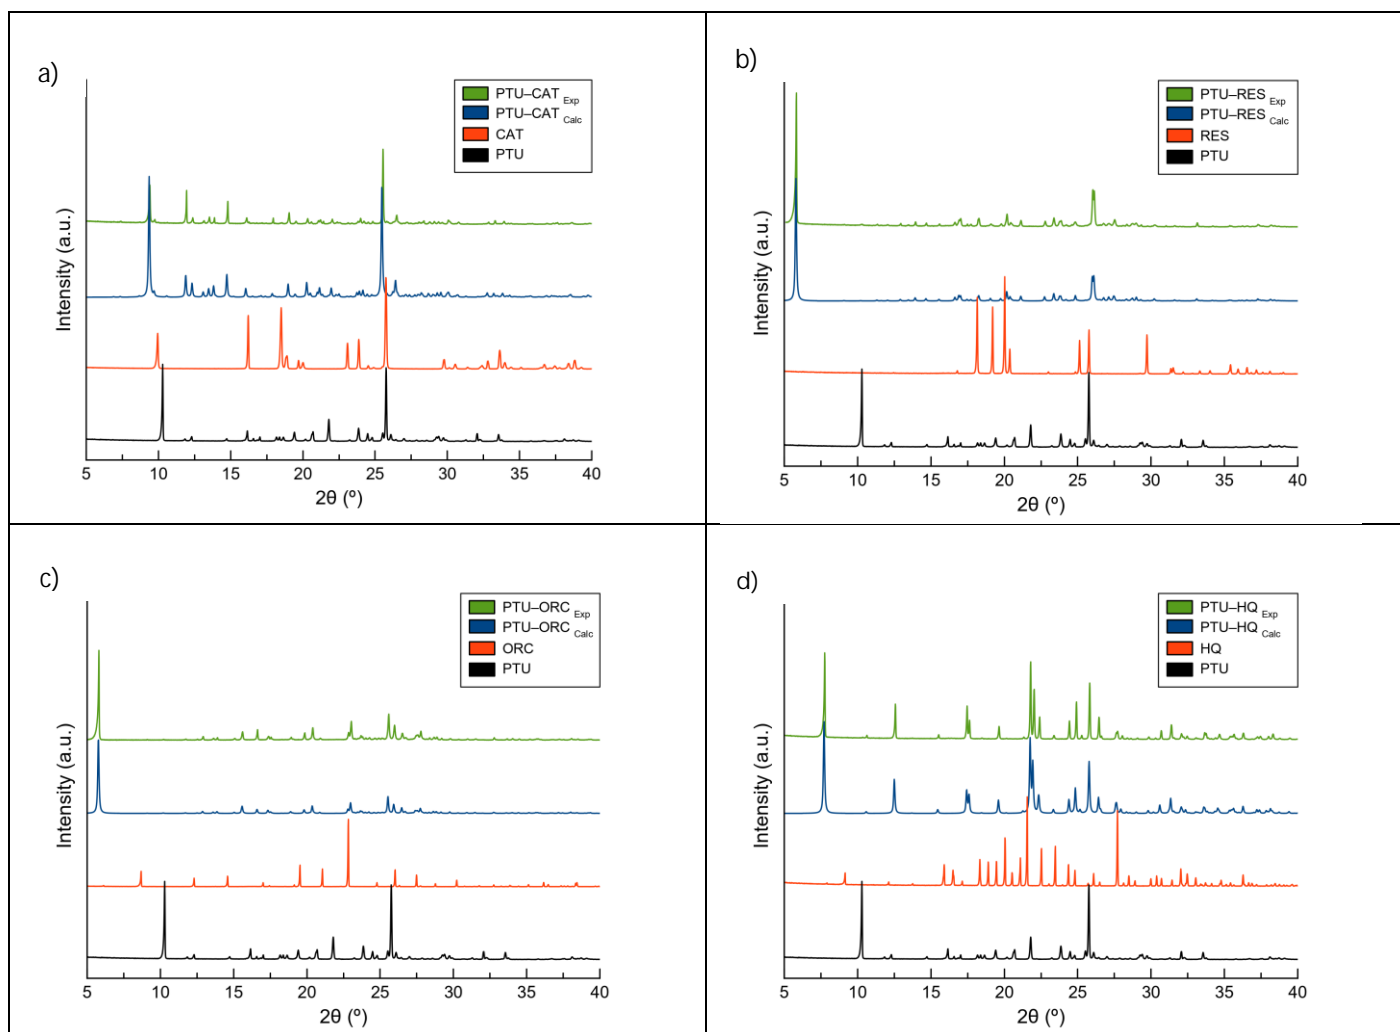

Figure S1. PXRD patterns of the PTU cocrystals obtained by LAG, compared with their respective components.

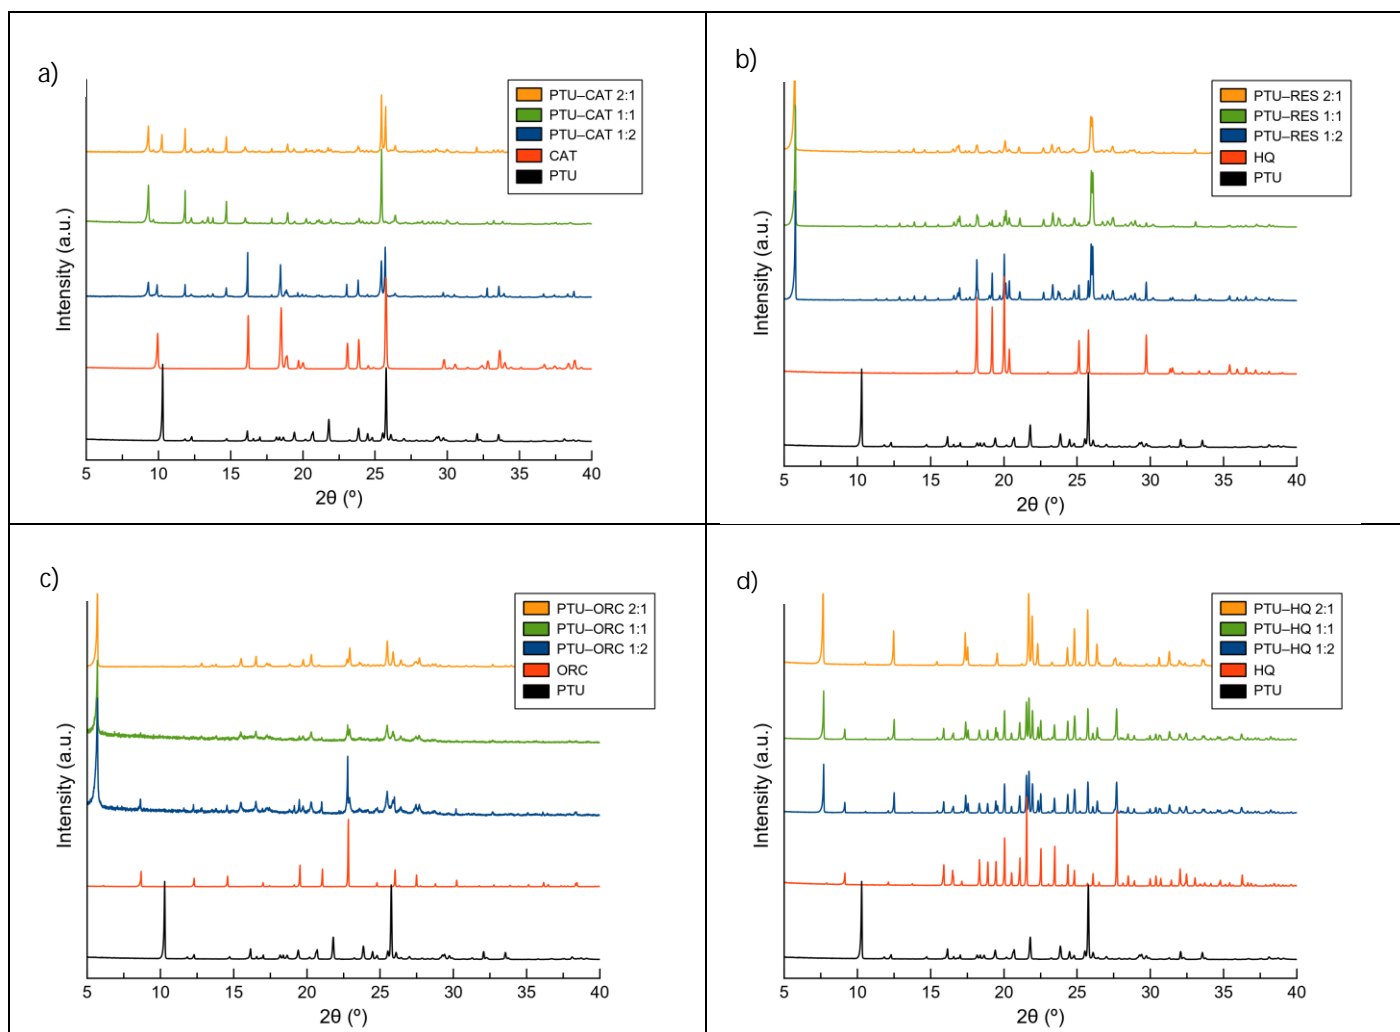

Figure S2. PXRD patterns of PTU cocrystals obtained by grinding the two components at different molar ratios.

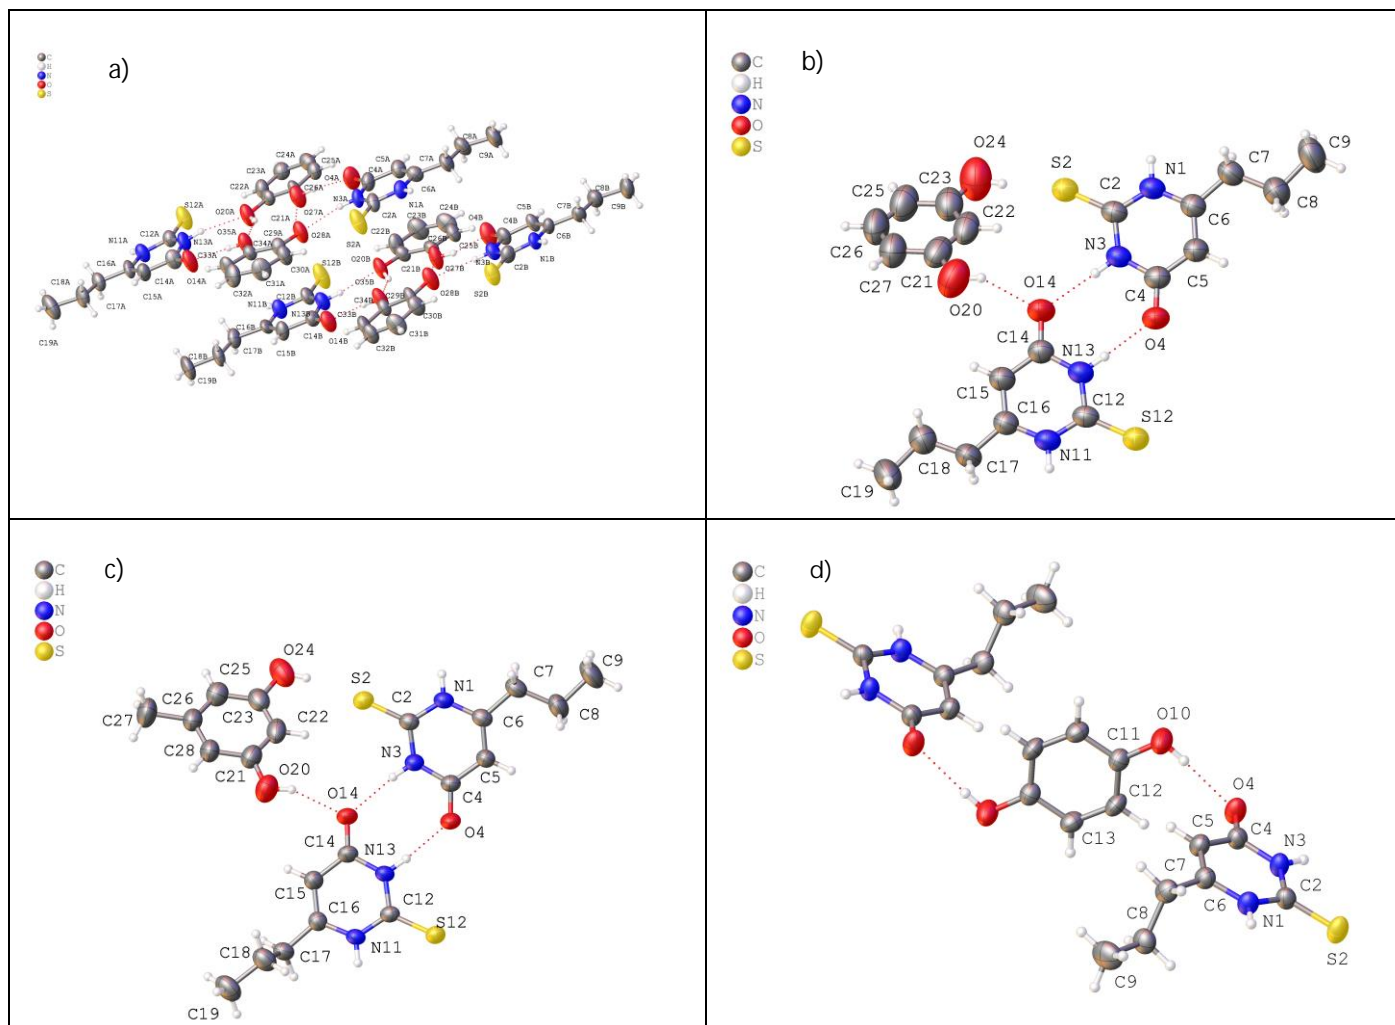

Figure S3. ORTEP representation showing the asymmetric unit of PTU—CAT (a), PTU—RES (b), PTU—ORC (c) and PTU—HQ with atom numbering scheme (thermal ellipsoids are plotted with the 50% probability level).

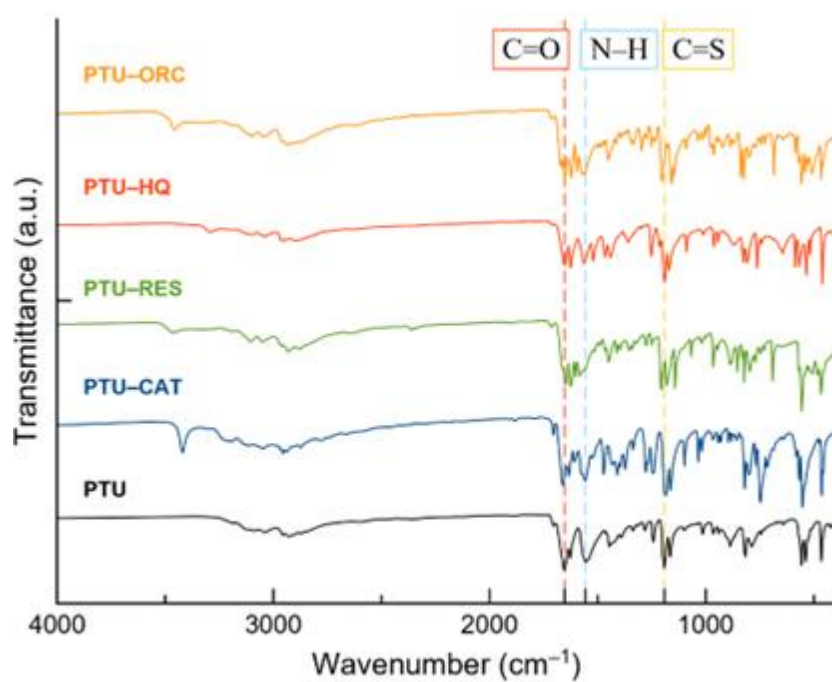

Figure 4. FT-IR spectrum of pure PTU and the cocrystals reported.

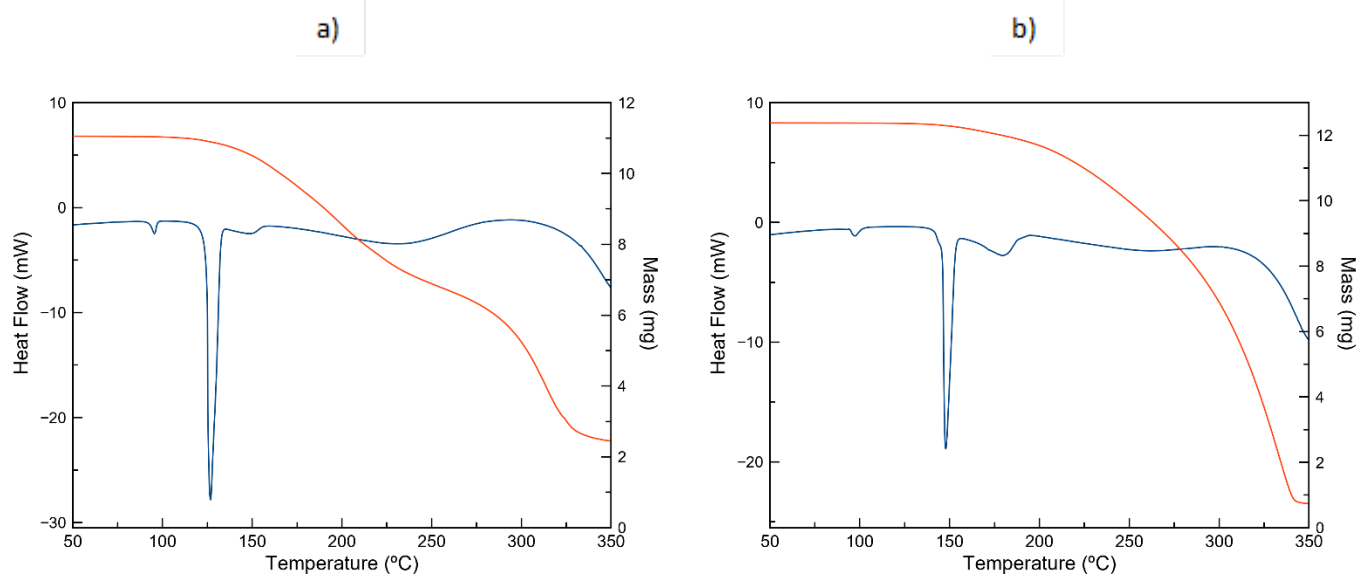

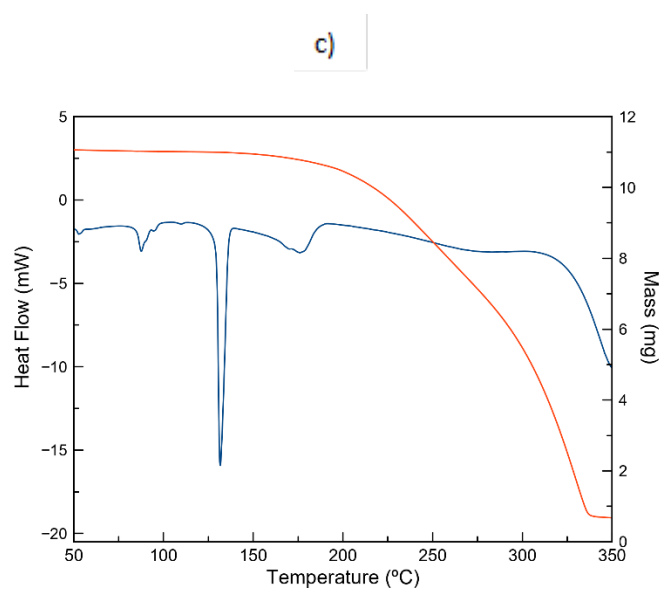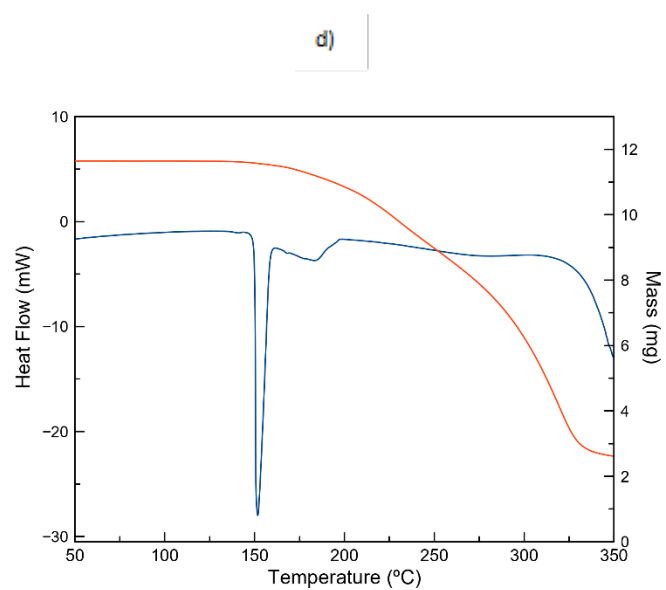

Figure S5. DSC-TG traces of a) ETZ-CAT, b) ETZ-RES, c) ETZ-ORC and d) ETZ-HQ.

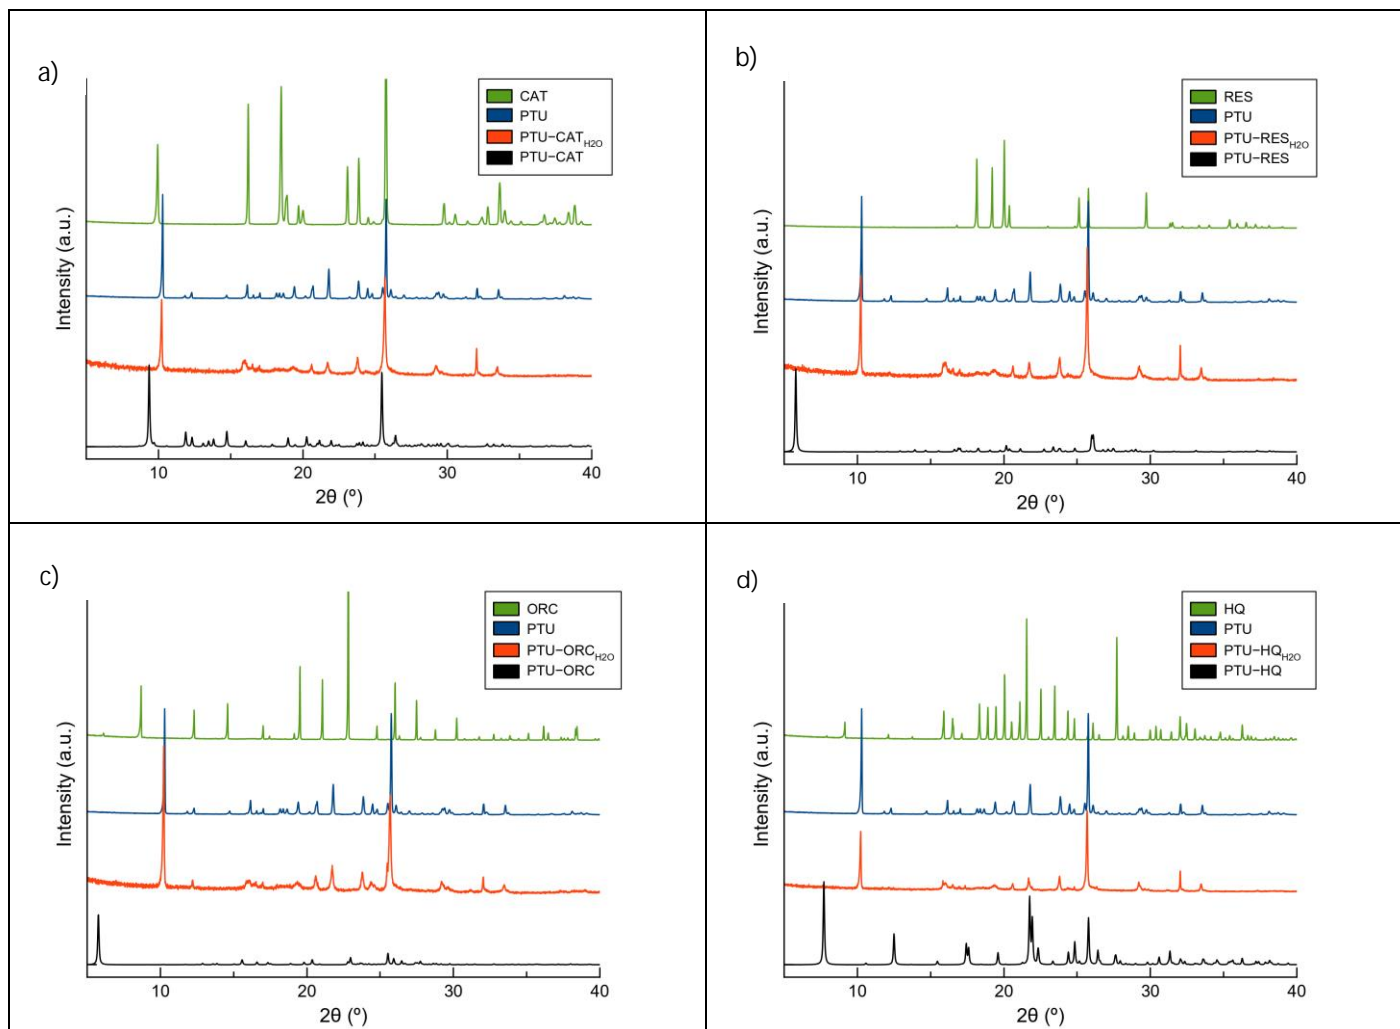

Figure S6. PXRD patterns of the reported PTU cocrystals after aqueous slurring (pH 6.8 phosphate buffer medium) for 24 hours.

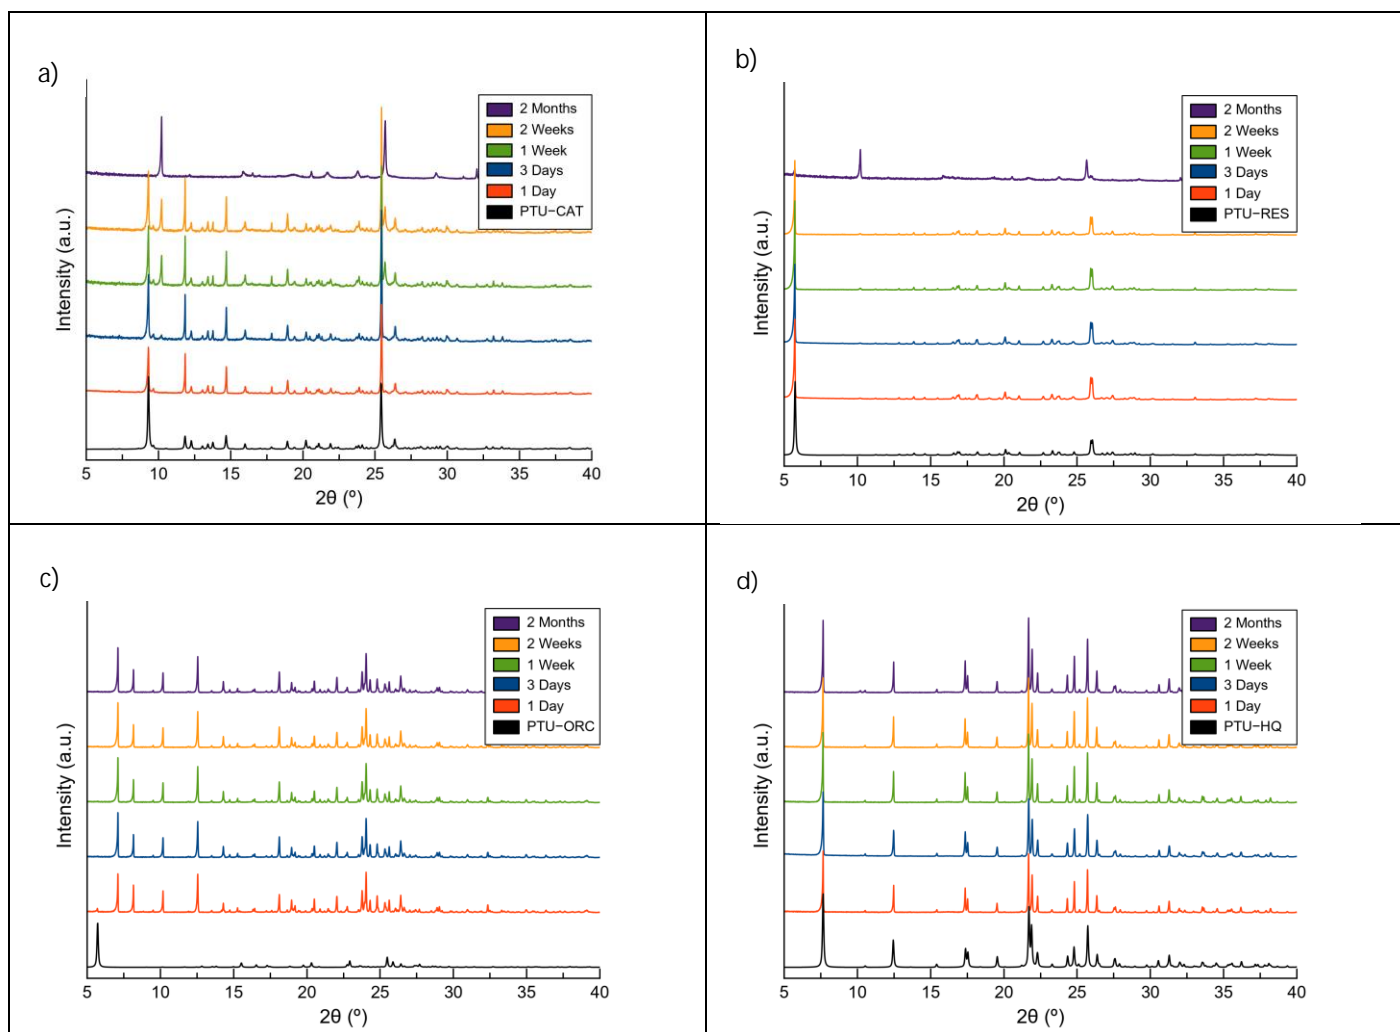

Figure S7. PXRD patterns of reported molecular salts under accelerated ageing conditions for 2 months.



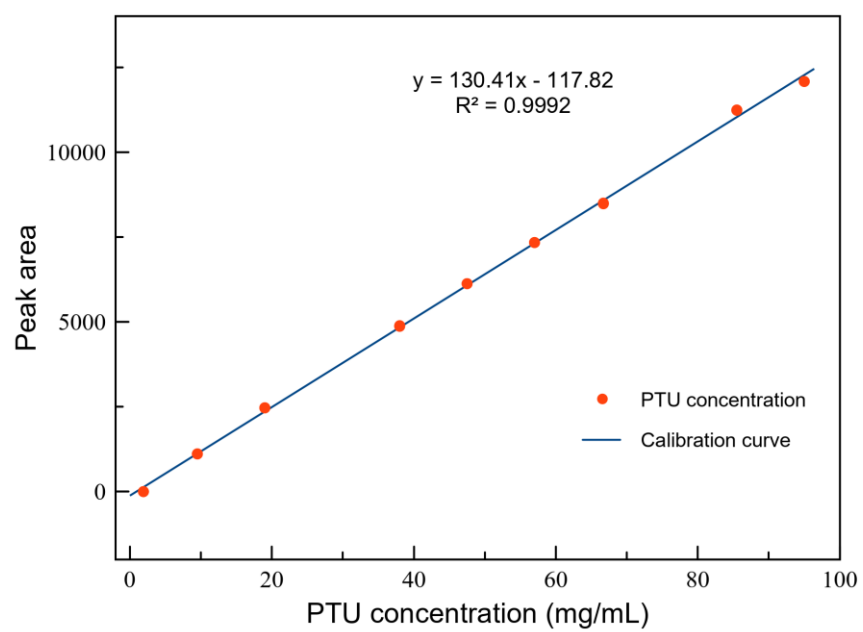

Figure S8. Calibration curve of PTU determined from HPLC data.

Table S1. Crystallographic data and structure refinement details of PTU cocrystals.

| Identification code                | PTU—CAT                                                         | PTU—RES                                                                      | PTU—HQ                                                          | PTU—ORC                                                                      |
|------------------------------------|-----------------------------------------------------------------|------------------------------------------------------------------------------|-----------------------------------------------------------------|------------------------------------------------------------------------------|
| Formula                            | C <sub>13</sub> H <sub>16</sub> N <sub>2</sub> O <sub>3</sub> S | C <sub>20</sub> H <sub>26</sub> N <sub>4</sub> O <sub>4</sub> S <sub>2</sub> | C <sub>10</sub> H <sub>13</sub> N <sub>2</sub> O <sub>2</sub> S | C <sub>21</sub> H <sub>28</sub> N <sub>4</sub> O <sub>4</sub> S <sub>2</sub> |
| Formula weight                     | 280.34                                                          | 450.57                                                                       | 450.57                                                          | 464.59                                                                       |
| Crystal system                     | Monoclinic                                                      | Triclinic                                                                    | Triclinic                                                       | Triclinic                                                                    |
| Space group                        | P2 <sub>1</sub>                                                 | P-1                                                                          | P-1                                                             | P-1                                                                          |
| a/Å                                | 13.701(5)                                                       | 7.6530(3)                                                                    | 5.777(3)                                                        | 7.8859(6)                                                                    |
| b/Å                                | 14.002(5)                                                       | 10.2143(4)                                                                   | 8.491(3)                                                        | 10.1513(7)                                                                   |
| c/Å                                | 15.910(6)                                                       | 15.3443(7)                                                                   | 11.517(5)                                                       | 15.5615(13)                                                                  |
| $\alpha$ /°                        | 90                                                              | 82.998(2)                                                                    | 84.18(2)                                                        | 81.425(3)                                                                    |
| $\beta$ /°                         | 110.549(6)                                                      | 87.179(3)                                                                    | 87.16(2)                                                        | 81.944(4)                                                                    |
| $\gamma$ /°                        | 90                                                              | 73.614(2)                                                                    | 81.02(2)                                                        | 74.319(3)                                                                    |
| V/Å <sup>3</sup>                   | 2858.0(17)                                                      | 1142.03(8)                                                                   | 554.8(4)                                                        | 1179.42(16)                                                                  |
| Z                                  | 8                                                               | 2                                                                            | 1                                                               | 2                                                                            |
| D <sub>c</sub> /g cm <sup>-3</sup> | 1.303                                                           | 1.310                                                                        | 1.348                                                           | 1.308                                                                        |
| F(000)                             | 1184                                                            | 476                                                                          | 238                                                             | 492                                                                          |
| Reflections collected              | 38488                                                           | 13620                                                                        | 6215                                                            | 19123                                                                        |
| Unique reflections                 | 9446                                                            | 3978                                                                         | 1886                                                            | 4133                                                                         |
| Data / restraints / parameters     | 9446 / 1 / 693                                                  | 3978 / 0 / 275                                                               | 1886 / 0 / 139                                                  | 4133 / 0 / 285                                                               |
| Goodness-of-fit on F <sup>2</sup>  | 0.974                                                           | 1.050                                                                        | 1.102                                                           | 0.999                                                                        |
| R1 (I > 2 $\sigma$ (I))            | 0.0682                                                          | 0.0473                                                                       | 0.0325                                                          | 0.0506                                                                       |
| wR2 (I > 2 $\sigma$ (I))           | 0.1435                                                          | 0.1264                                                                       | 0.0809                                                          | 0.1097                                                                       |

Table S2. Hydrogen bonds for PTU cocrystals [ $\text{\AA}$  and deg.].

| PTU—CAT | D-H...A                                                                       | d(D-H) | d(H...A) | d(D...A)  | <(DHA) |
|---------|-------------------------------------------------------------------------------|--------|----------|-----------|--------|
|         | N(3A)-H(3A)...O(28A)                                                          | 0.86   | 2.15     | 2.989(11) | 166.7  |
|         | N(3B)-H(3B)...O(28B)                                                          | 0.86   | 2.18     | 3.040(11) | 173.0  |
|         | N(13A)-H(13A)...O(20A)                                                        | 0.86   | 2.20     | 3.046(11) | 168.6  |
|         | N(13B)-H(13B)...O(20B)                                                        | 0.86   | 2.14     | 2.994(12) | 171.3  |
|         | O(20A)-H(20A)...O(35A)                                                        | 0.82   | 2.04     | 2.753(10) | 144.9  |
|         | O(27A)-H(27A)...O(4A)                                                         | 0.82   | 1.83     | 2.643(12) | 168.7  |
|         | O(20B)-H(20B)...O(35B)                                                        | 0.82   | 2.07     | 2.768(11) | 142.8  |
|         | O(27B)-H(27B)...O(4B)                                                         | 0.82   | 1.87     | 2.679(11) | 166.5  |
|         | O(28A)-H(28A)...O(27A)                                                        | 0.82   | 2.10     | 2.774(10) | 139.9  |
|         | O(35A)-H(35A)...O(14A)                                                        | 0.82   | 1.86     | 2.677(11) | 178.1  |
|         | O(28B)-H(28B)...O(27B)                                                        | 0.82   | 2.05     | 2.719(10) | 138.8  |
|         | O(35B)-H(35B)...O(14B)                                                        | 0.82   | 1.84     | 2.657(11) | 173.0  |
| PTU—RES | D-H...A                                                                       | d(D-H) | d(H...A) | d(D...A)  | <(DHA) |
|         | N(3)-H(3)...O(14)                                                             | 0.86   | 1.98     | 2.837(3)  | 176.7  |
|         | N(13)-H(13)...O(4)                                                            | 0.86   | 1.95     | 2.796(3)  | 166.9  |
|         | C(22)-H(22)...O(4)#1                                                          | 0.93   | 2.59     | 3.197(4)  | 123.6  |
|         | O(20)-H(20)...O(14)                                                           | 0.82   | 2.09     | 2.820(3)  | 148.4  |
|         | Symmetry transformations used to generate equivalent atoms: #1 -x+1,-y+1,-z+1 |        |          |           |        |
| PTU—HQ  | D-H...A                                                                       | d(D-H) | d(H...A) | d(D...A)  | <(DHA) |
|         | N(3)-H(3)...O(4)#1                                                            | 0.86   | 1.98     | 2.839(2)  | 172.0  |
|         | O(10)-H(10)...O(4)                                                            | 0.82   | 1.98     | 2.786(2)  | 168.2  |
|         | Symmetry transformations used to generate equivalent atoms: #1 -x+1,-y,-z+1   |        |          |           |        |
| PTU—ORC | D-H...A                                                                       | d(D-H) | d(H...A) | d(D...A)  | <(DHA) |
|         | N(3)-H(3)...O(14)                                                             | 0.86   | 1.99     | 2.846(4)  | 170.3  |
|         | N(13)-H(13)...O(4)                                                            | 0.86   | 1.91     | 2.766(4)  | 174.4  |
|         | O(20)-H(20)...O(14)                                                           | 0.82   | 2.07     | 2.809(4)  | 150.3  |

Table S3.  $\pi$ -stacking interactions analysis of PTU cocrystals.

## PTU-CAT

|                       |     |     |     |     |     |     |     |     |     |     |     |     |  |  |
|-----------------------|-----|-----|-----|-----|-----|-----|-----|-----|-----|-----|-----|-----|--|--|
| 6-Membered Ring ( 1 ) | N1  | --> | C2  | --> | N3  | --> | C4  | --> | C5  | --> | C6  | --> |  |  |
| 6-Membered Ring ( 2 ) | N11 | --> | C12 | --> | N13 | --> | C14 | --> | C15 | --> | C16 | --> |  |  |
| 6-Membered Ring ( 3 ) | C21 | --> | C22 | --> | C23 | --> | C24 | --> | C25 | --> | C26 | --> |  |  |
| 6-Membered Ring ( 4 ) | C29 | --> | C30 | --> | C31 | --> | C32 | --> | C33 | --> | C34 | --> |  |  |

=====

Analysis of Short Ring-Interactions with Cg-Cg Distances < 6.0 Ang., Alpha < 20.000 Deg. and Beta < 60.0 Deg.

=====

| Cg(I)      | Res(I)                 | Cg(J)             | [ ARU(J)]       | Cg-Cg Transformed J-Plane P, Q, R, S |                |                 |             | Alpha       | Beta              | Gamma             | CgI_Perp     | CgJ_Perp   | Slippage |
|------------|------------------------|-------------------|-----------------|--------------------------------------|----------------|-----------------|-------------|-------------|-------------------|-------------------|--------------|------------|----------|
| Cg1        | [ 1 ] -> Cg1           | [ 2565.01]        | 5.7733(18)      | -0.9569                              | 0.1140         | 0.2669          | -0.5088     | 0.00(16)    | 56.6              | 56.6              | 3.1793(14)   | 3.1794(14) | 4.819    |
| <b>Cg1</b> | <b>[ 1 ] -&gt; Cg3</b> | <b>[ 1455.03]</b> | <b>3.748(2)</b> | <b>0.9289-0.2188-0.2987</b>          | <b>-6.7221</b> | <b>6.48(17)</b> | <b>18.6</b> | <b>21.2</b> | <b>3.4932(13)</b> | <b>3.5520(15)</b> | <b>1.195</b> |            |          |
| Cg1        | [ 1 ] -> Cg3           | [ 1555.03]        | 4.541(2)        | 0.9289-0.2188-0.2987                 | 0.0810         | 6.48(17)        | 40.4        | 43.2        | 3.3099(13)        | 3.4564(15)        | 2.946        |            |          |
| Cg2        | [ 2 ] -> Cg4           | [ 1455.04]        | 4.509(2)        | 0.9582 0.0823-0.2742                 | -4.9344        | 5.36(16)        | 40.8        | 41.3        | 3.3867(13)        | 3.4123(15)        | 2.947        |            |          |
| <b>Cg2</b> | <b>[ 2 ] -&gt; Cg4</b> | <b>[ 1555.04]</b> | <b>3.904(2)</b> | <b>0.9582 0.0823-0.2742</b>          | <b>2.0829</b>  | <b>5.36(16)</b> | <b>25.8</b> | <b>21.6</b> | <b>3.6305(13)</b> | <b>3.5142(15)</b> | <b>1.701</b> |            |          |
| Cg3        | [ 3 ] -> Cg1           | [ 1555.01]        | 4.541(2)        | 0.9569-0.1140-0.2669                 | -2.6706        | 6.48(17)        | 43.2        | 40.4        | 3.4564(15)        | 3.3099(13)        | 3.109        |            |          |
| <b>Cg3</b> | <b>[ 3 ] -&gt; Cg1</b> | <b>[ 1655.01]</b> | <b>3.748(2)</b> | <b>0.9569-0.1140-0.2669</b>          | <b>4.3378</b>  | <b>6.48(17)</b> | <b>21.2</b> | <b>18.6</b> | <b>3.5520(15)</b> | <b>3.4932(13)</b> | <b>1.357</b> |            |          |
| <b>Cg4</b> | <b>[ 4 ] -&gt; Cg2</b> | <b>[ 1555.02]</b> | <b>3.904(2)</b> | <b>0.9458 0.1749-0.2738</b>          | <b>-0.3258</b> | <b>5.36(16)</b> | <b>21.6</b> | <b>25.8</b> | <b>3.5142(15)</b> | <b>3.6305(13)</b> | <b>1.436</b> |            |          |
| Cg4        | [ 4 ] -> Cg2           | [ 1655.02]        | 4.509(2)        | 0.9458 0.1749-0.2738                 | 6.6006         | 5.36(16)        | 41.3        | 40.8        | 3.4122(15)        | 3.3868(13)        | 2.977        |            |          |
| -----      |                        |                   |                 | -----                                |                |                 |             |             |                   |                   |              |            |          |
| Min or Max |                        |                   |                 | 3.748                                | 0.0            | 18.6            | 56.6        | -3.631      | -3.631            |                   |              |            |          |

[ 2565 ] = -X,1-Y,-Z [ 1455 ] = -1+X,Y,Z [ 1555 ] = X,Y,Z [ 1455 ] = -1+X,Y,Z [ 1555 ] = X,Y,Z [ 1555 ] = X,Y,Z [ 1655 ] = 1+X,Y,Z

[ 1555 ] = X,Y,Z [ 1655 ] = 1+X,Y,Z

=====

Analysis of X-H...Cg(Pi-Ring) Interactions (H..Cg < 3.0 Ang. - Gamma < 40.0 Deg)

=====

| X--H(I)    | Res(I) | Cg(J)        | [ ARU(J)]  | H..Cg | Transformed J-Plane P, Q, R, S |         |        |       | H-Perp | Gamma    | X-H..Cg | X..Cg | X-H,Pi |
|------------|--------|--------------|------------|-------|--------------------------------|---------|--------|-------|--------|----------|---------|-------|--------|
| C7         | -H7A   | [ 1 ] -> Cg3 | [ 1555.03] | 2.70  | 0.9289-0.2188-0.2987           | 0.0810  | -2.70  | 2.38  | 143    | 3.525(3) | 53      |       |        |
| C17        | -H17B  | [ 2 ] -> Cg4 | [ 1455.04] | 2.70  | 0.9582 0.0823-0.2742           | -4.9344 | 2.69   | 4.75  | 140    | 3.501(4) | 54      |       |        |
| -----      |        |              |            | ----- |                                |         |        |       |        |          |         |       |        |
| Min or Max |        |              |            | 2.700 | -2.700                         | 2.4     | 143.00 | 3.501 | 54.00  |          |         |       |        |

[ 1555 ] = X,Y,Z

[ 1455 ] = -1+X,Y,Z

Table S3 (cont.).  $\pi$ -stacking interactions analysis of PTU cocrystals.

## PTU-RES

|                      |     |     |     |     |     |     |     |     |     |     |     |     |
|----------------------|-----|-----|-----|-----|-----|-----|-----|-----|-----|-----|-----|-----|
| 6-Membered Ring ( 1) | N1  | --> | C2  | --> | N3  | --> | C4  | --> | C5  | --> | C6  | --> |
| 6-Membered Ring ( 2) | N11 | --> | C12 | --> | N13 | --> | C14 | --> | C15 | --> | C16 | --> |
| 6-Membered Ring ( 3) | C21 | --> | C22 | --> | C23 | --> | C25 | --> | C26 | --> | C27 | --> |

---

Analysis of X-H...Cg(Pi-Ring) Interactions (H..Cg < 3.0 Ang. - Gamma < 40.0 Deg)

---

| X--H(I) | Res(I) | Cg(J)       | [ ARU(J)]  | H..Cg | Transformed J-Plane P, Q, R, S | H-Perp Gamma        | X-H..Cg | X..Cg    | X-H,Pi |
|---------|--------|-------------|------------|-------|--------------------------------|---------------------|---------|----------|--------|
| C19     | -H19C  | [ 2] -> Cg3 | [ 1645.03] | 2.85  | 0.9487-0.3144 0.0344           | 10.1737 -2.79 11.35 | 170     | 3.800(4) | 81     |
|         |        |             | -----      |       |                                |                     |         |          |        |
|         |        |             | Min or Max | 2.850 |                                | -2.794 11.4 170.00  | 3.800   | 81.00    |        |

[ 1645] = 1+X,-1+Y,Z

---

Analysis of Y-X...Cg(Pi-Ring) Interactions (X..Cg < 4.0 Ang. - Gamma < 30.0 Deg)

---

| Y--X(I) | Res(I) | Cg(J)       | [ ARU(J)]  | X..Cg      | Transformed J-Plane P, Q, R, S | X-Perp Gamma         | Y-X..Cg   | Y..Cg    | Y-X,Pi |
|---------|--------|-------------|------------|------------|--------------------------------|----------------------|-----------|----------|--------|
| C2      | -S2    | [ 1] -> Cg1 | [ 2566.01] | 3.4926(11) | -0.9024-0.4220-0.0873          | -3.0087 -3.424 11.35 | 89.53(8)  | 3.855(3) | 1.01   |
| C12     | -S12   | [ 2] -> Cg2 | [ 2656.02] | 3.6052(13) | -0.9225-0.3859 0.0059          | -2.4193 -3.503 13.64 | 85.84(9)  | 3.861(3) | 0.16   |
| C14     | -O14   | [ 2] -> Cg1 | [ 2666.01] | 3.422(2)   | -0.9024-0.4220-0.0873          | -9.9147 3.405 5.70   | 87.89(18) | 3.600(3) | 1.72   |
|         |        |             | -----      |            |                                |                      |           |          |        |
|         |        |             | Min or Max | 3.422      |                                | -3.503 5.7 89.53     | 3.600     | 1.72     |        |

[ 2566] = -X,1-Y,1-Z  
 [ 2656] = 1-X,-Y,1-Z  
 [ 2666] = 1-X,1-Y,1-Z

Table S3 (cont.).  $\pi$ -stacking interactions analysis of PTU cocrystals.

## PTU-ORC

6-Membered Ring ( 1) N1 --> C2 --> N3 --> C4 --> C5 --> C6 -->  
 6-Membered Ring ( 2) N11 --> C12 --> N13 --> C14 --> C15 --> C16 -->  
 6-Membered Ring ( 3) C21 --> C22 --> C23 --> C25 --> C26 --> C28 -->

 =====  
 Analysis of X-H...Cg(Pi-Ring) Interactions (H..Cg < 3.0 Ang. - Gamma < 40.0 Deg)
 =====

| X--H(I)   | Res(I)  | Cg(J) | [ ARU(J)]  | H..Cg | Transformed J-Plane P, Q, R, S | H-Perp Gamma       | X-H..Cg | X..Cg X-H,Pi |
|-----------|---------|-------|------------|-------|--------------------------------|--------------------|---------|--------------|
| C19 -H19C | [ 2] -> | Cg3   | [ 1645.03] | 2.90  | 0.9727-0.1556-0.1723           | 10.1114 -2.89 4.66 | 138     | 3.678(6) 53  |
|           |         |       | Min or Max | 2.900 |                                | -2.894 4.7 138.00  | 3.678   | 53.00        |

[ 1645] = 1+X,-1+Y,Z

"6ORC" " PLATON-GEOMETRY Page 48

 =====  
 Analysis of Y-X...Cg(Pi-Ring) Interactions (X..Cg < 4.0 Ang. - Gamma < 30.0 Deg)
 =====

| Y--X(I)  | Res(I)  | Cg(J) | [ ARU(J)]  | X..Cg      | Transformed J-Plane P, Q, R, S | X-Perp Gamma         | Y-X..Cg   | Y..Cg Y-X,Pi  |
|----------|---------|-------|------------|------------|--------------------------------|----------------------|-----------|---------------|
| C2 -S2   | [ 1] -> | Cg1   | [ 2566.01] | 3.4689(19) | -0.8291-0.5586-0.0240          | -3.7346 -3.425 9.13  | 89.60(13) | 3.835(4) 0.53 |
| C12 -S12 | [ 2] -> | Cg2   | [ 2656.02] | 3.619(2)   | -0.9059-0.4207-0.0485          | -3.5236 -3.530 12.77 | 92.94(14) | 4.066(4) 1.21 |
| C14 -O14 | [ 2] -> | Cg1   | [ 2666.01] | 3.385(4)   | -0.8291-0.5586-0.0240          | -10.2729 3.192 19.43 | 78.7(2)   | 3.368(4) 8.09 |
|          |         |       | Min or Max | 3.385      |                                | -3.530 9.1 92.94     | 3.368     | 8.09          |

[ 2566] = -X,1-Y,1-Z

[ 2656] = 1-X,-Y,1-Z

[ 2666] = 1-X,1-Y,1-Z

Table S3 (cont.).  $\pi$ -stacking interactions analysis of PTU cocrystals.  
PTU-HQ

```

6-Membered Ring ( 1)  N1    -->   C2    -->   N3    -->   C4    -->   C5    -->   C6    -->
6-Membered Ring ( 2)  C11   -->  C12   -->  C13   -->  C11_a -->  C12_a -->  C13_a -->

```

Analysis of Short Ring-Interactions with Cg-Cg Distances < 6.0 Ang., Alpha < 20.000 Deg. and Beta < 60.0 Deg.

| Cg(I) | Res(I)   | Cg(J) | [ ARU(J) ] | Cg-Cg    | Transformed           | J-Plane       | P, Q, R, S | Alpha   | Beta     | Gamma     | CgI_Perp  | CgJ_Perp  | Slippage  |
|-------|----------|-------|------------|----------|-----------------------|---------------|------------|---------|----------|-----------|-----------|-----------|-----------|
| Cg1   | [ 1 ] -> | Cg1   | [ 1455.01] | 5.777(3) | 0.6051-0.4845         | 0.6317        | 1.9437     | 0.00(8) | 52.8     | 52.8      | 3.4959(7) | 3.4959(7) | 4.599     |
| Cg1   | [ 1 ] -> | Cg1   | [ 1655.01] | 5.777(3) | 0.6051-0.4845         | 0.6317        | 8.9355     | 0.00(8) | 52.8     | 52.8      | 3.4959(7) | 3.4959(7) | 4.599     |
| Cg1   | [ 1 ] -> | Cg1   | [ 2666.01] | 4.207(2) | -0.6051               | 0.4845-0.6317 | -1.8439    | 0.00(8) | 31.3     | 31.3      | 3.5957(7) | 3.5957(7) | 2.184     |
| Cg1   | [ 1 ] -> | Cg2   | [ 1655.02] | 5.355(3) | 0.4052                | 0.9101        | 0.0873     | 4.5658  | 81.92(8) | 17.6      | 84.2      | 0.5436(7) | 5.1057(7) |
| Cg1   | [ 1 ] -> | Cg2   | [ 2657.02] | 5.355(3) | -0.4052-0.9101-0.0873 | -4.5658       | 81.92(8)   | 17.6    | 84.2     | 0.5436(7) | 5.1057(7) |           |           |
|       |          |       | -----      |          |                       |               |            |         |          |           |           |           |           |
|       |          |       | Min or Max | 4.207    |                       |               | 0.0        | 17.6    | 84.2     |           | -3.596    | -3.596    |           |

$$\begin{aligned} [1455] &= -1+X,Y,Z \\ [1655] &= 1+X,Y,Z \\ [2666] &= 1-X,1-Y,1-Z \\ [1655] &= 1+X,Y,Z \\ [2657] &= 1-X,-Y,2-Z \end{aligned}$$

Table S4. Maximum apparent solubility ( $S_{\max}$ ) of PTU and its cocrystals in pH 6.8 phosphate buffer medium.

|         | $S_{\max}$ (mg·mL <sup>-1</sup> ) | Time to reach $S_{\max}$ (min) | Solubility enhancement |
|---------|-----------------------------------|--------------------------------|------------------------|
| PTU     | 1.28                              | 30                             |                        |
| PTU-CAT | 1.26                              | 5                              | 0.98X                  |
| PTU-RES | 1.69                              | 10                             | 1.32X                  |
| PTU-ORC | 1.66                              | 30                             | 1.29X                  |
| PTU-HQ  | 1.67                              | 5                              | 1.30X                  |
